# Supplementary material
Source: MDPI journal article supplement (https://www.mdpi.com/2673-4591/53/1/55)
Supplement: s1 [file s1]

# How much does **location** determine the market value of a building according to a multiple **econometric** analysis?

Massimiliano Scarpa, Laura Gabrielli and Aurora Greta Ruggeri

“There are three things that matter in property: location, location, location”

Lord Harold Samuel (Apocryphal)

## Topic of interest

Topic

Discuss how **fixed effects** influence the best estimate of a premise's market value through **multi-parametric** estimation techniques

Development

Investigate whether (or not) the recent events of the Covid-19 pandemic and the **War in Ukraine** have changed the influence of the property's location over its market value

## Research Question?

- How much does location determine the market value of a building according?
- Does the axiom "location, location, location" remain unchanged in 2023?

## Method and Development

### DOWNLOAD OBSERVATIONS

The case study of PADOVA (North Italy)

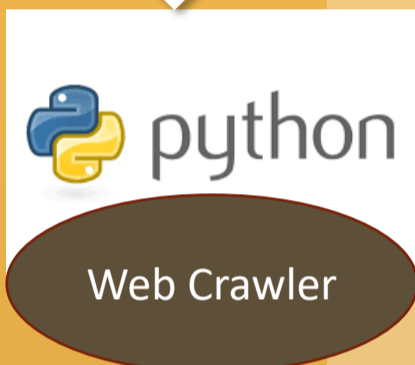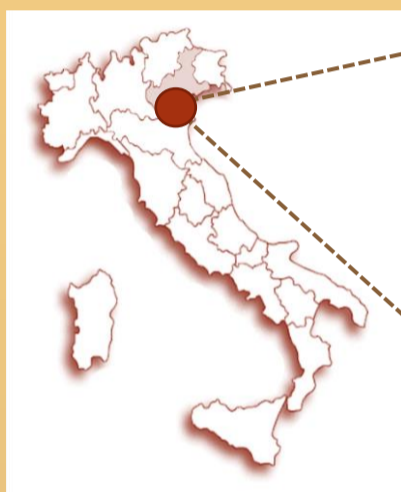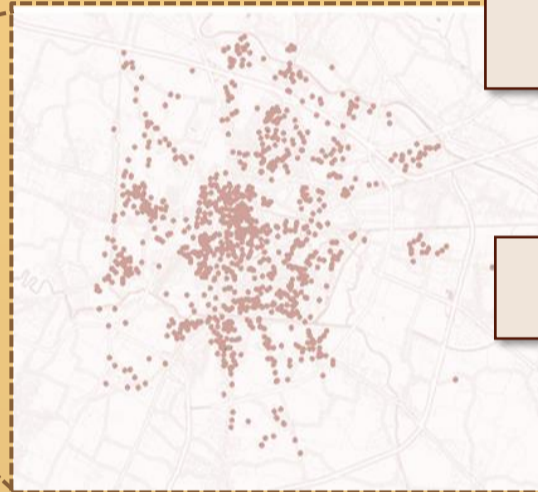

#### Construction features

- Energy class
- Maintenance
- Area and rooms
- Garden
- Cellar
- Terrace
- Parking
- Building type
- Plants

#### Location features

- city center
- train station
- bus and tram
- education
- commercial facilities
- urban parks
- sports facilities
- hospitals

### FEATURE SELECTION PROCESS

Random Forest

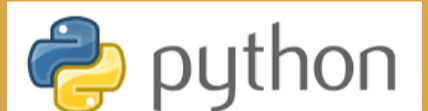

Variables selection

## Results

### ECONOMETRIC ANALYSIS

Multivariate regression

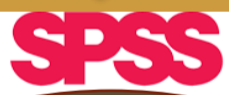

Stepwise analysis

Unit of measure selected per each regressor

|                    |                                 | Simulation A         |             |      | Simulation B         |             |        | Simulation C         |             |      | Simulation D         |             |      | Simulation E         |             |      |
|--------------------|---------------------------------|----------------------|-------------|------|----------------------|-------------|--------|----------------------|-------------|------|----------------------|-------------|------|----------------------|-------------|------|
|                    |                                 | t <sub>student</sub> | Coefficient | Keep | t <sub>student</sub> | Coefficient | Keep   | t <sub>student</sub> | Coefficient | Keep | t <sub>student</sub> | Coefficient | Keep | t <sub>student</sub> | Coefficient | Keep |
| Constant           |                                 |                      | 1997.1      |      | 1971.1               |             | 2010.6 |                      | 2180.3      |      | 2010.4               |             |      |                      |             |      |
| Area               | Square meters                   | -5.21                | -1.71       | x    | -5.22                | -1.72       | x      | -7.03                | -1.75       | x    | -6.97                | -1.73       | x    | -6.94                | -1.73       | x    |
| Number of Rooms    | Total number                    | -0.08                | -2.16       | x    | -0.08                | -2.21       |        |                      |             |      |                      |             |      |                      |             |      |
| Energy Performance | Energy class from A4 to G       | 22.33                | 149.47      | x    | 22.45                | 149.55      | x      | 22.46                | 149.46      | x    | 22.30                | 148.12      | x    | 22.14                | 146.84      | x    |
| Hospitals          | Straight line distance          | -1.18                | -99.94      | x    | -1.17                | -98.37      |        |                      |             |      |                      |             |      |                      |             |      |
| Leisure Services   | N. in a 1 km ring buffer        | -1.55                | -1.80       | x    | -1.56                | -1.79       | x      | -1.79                | -2.03       |      |                      |             |      |                      |             |      |
| Cultural Services  | N. in a 1 km ring buffer        | 5.04                 | 12.78       | x    | 5.16                 | 12.67       | x      | 5.30                 | 12.98       | x    | 13.32                | 8.14        | x    | 13.04                | 7.58        | x    |
| Medical Centers    | N. in a 1 km ring buffer        | -0.18                | -0.57       |      |                      |             |        |                      |             |      |                      |             |      |                      |             |      |
| Pharmacies         | Travel time by public transport | 1.63                 | 12.87       | x    | 1.64                 | 12.92       |        |                      |             |      |                      |             |      |                      |             |      |
| Primary School     | N. in a 1 km ring buffer        | -2.63                | -53.31      | x    | -2.66                | -53.62      | x      | -2.95                | -58.75      | x    | -3.67                | -70.00      | x    |                      |             |      |
| Nursery            | Straight line distance          | -0.07                | -6.07       |      |                      |             |        |                      |             |      |                      |             |      |                      |             |      |
| Shopping Malls     | N. in a 1 km ring buffer        | -3.48                | -45.09      | x    | -3.53                | -45.15      | x      | -3.28                | -39.99      | x    | -4.61                | -50.71      | x    | -4.75                | -52.42      | x    |
| Small Commercial   | Straight line distance          | -2.28                | -178.15     | x    | -2.34                | -173.92     | x      | -2.23                | -163.77     | x    | -2.15                | -158.33     |      |                      |             |      |
| City center        | Actual travel distance by car   | -3.60                | -60.70      | x    | -3.77                | -59.80      | x      | -4.20                | -65.34      | x    | -5.22                | -71.20      | x    | -7.41                | -92.52      | x    |
| Train Station      | Travel time by public transport | 1.17                 | 2.94        | x    | 1.27                 | 3.06        | x      | 1.26                 | 3.04        |      |                      |             |      |                      |             |      |

**Unitary Price =**

$$2010.4 - (1.73 * Area) + (146.84 * Energy Performance) + (7.58 * Cultural Services) - (52.42 * Shopping Malls) - (92.52 * City Centre)$$
